# Supplementary material for: A theoretical exploration on electronically excited states of protonated furan and thiophene
Source: Royal Society of Chemistry journal article supplement (doi:10.1039/c5pp00266d), 2015-10-23
Supplement: c5pp00266d1.pdf [file c5pp00266d1.pdf]

## A theoretical exploration on electronically excited states of protonated furan and thiophene

Reza Omidyan, Mohammad Salehi and Zahra Heidari

*Department of Chemistry, University of Isfahan, 81746-73441, Isfahan, Iran*

### **This supplementary file contains five Tables:**

**Table SM1:** Comparison the geometry parameters of neutral furan and thiophen with corresponding gas phase experimental results (presented in braket).

**Table SM2:** xyz coordinates revealed to the ground optimized geometry of neutral/protonated of furan and thiophene.

**Table SM3:** Vertical transition energies of neutral and protonated furan [FC1H<sup>+</sup>], computed at the CC2/aug-cc-pVDZ level of theory.

**Table SM4:** Vertical transition energies of neutral and protonated thiophene [TC1H<sup>+</sup>], computed at the CC2/aug-cc-pVDZ level of theory.

**Table SM5:** Basis set effect on the vertical and adiabatic transition energies of S<sub>2</sub>-S<sub>0</sub> and S<sub>1</sub>-S<sub>0</sub> of neutral Furan and Thiophene.

**Table SM1**

| 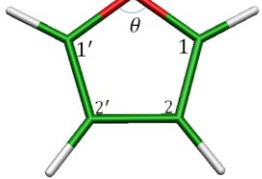 | Furan             |         | Thiophene          |         |
|-----------------------------------------------------------------------------------|-------------------|---------|--------------------|---------|
|                                                                                   | aug-cc-pVDZ       | cc-pVDZ | aug-cc-pVDZ        | cc-pVDZ |
| $r(X-C1)/\text{\AA}$                                                              | 1.372<br>[1.362]* | 1.364   | 1.730<br>[1.714]** | 1.726   |
| $r(C1-C2)/\text{\AA}$                                                             | 1.380<br>[1.360]  | 1.378   | 1.392<br>[1.369]   | 1.388   |
| $r(C2-C2')/\text{\AA}$                                                            | 1.438<br>[1.430]  | 1.436   | 1.427<br>[1.423]   | 1.427   |
| $r(C1-H1)/\text{\AA}$                                                             | 1.087<br>[1.075]  | 1.088   | 1.090<br>[1.077]   | 1.081   |
| $r(C2-H2)/\text{\AA}$                                                             | 1.088<br>[1.076]  | 1.089   | 1.092<br>[1.080]   | 1.093   |
| $\theta_1(C1'-X-C1)$                                                              | 106.9<br>[106.3]  | 106.8   | 92.1<br>[92.1]     | 92.0    |
| $\theta_2(X-C1-C2)$                                                               | 110.4<br>[110.4]  | 110.8   | 111.5<br>[111.2]   | 111.6   |
| $\theta_3(C1-C2-C2')$                                                             | 106.1<br>[106.3]  | 105.8   | 112.5<br>[112.2]   | 112.4   |
| $\theta_4(X-C1-H1)$                                                               | 115.8<br>[115.5]  | 115.8   | 120.0<br>[119.5]   | 120.3   |
| $\theta_5(C2'-C2-H2)$                                                             | 127.9<br>[127.5]  | 127.9   | 124.6<br>[124.1]   | 124.5   |

\*The experimental values have been adopted from: B. Bsreg et al *J. Mol. Spect.*, 1962, 9, 124-129

\*\*The experimental values have been adopted from: B. Bsreg et al *J. Mol. Spect.*, 1961, 7, 58-63.

**Table SM2**

| <b>Neutral Furan</b>                                                                |          |          |          |  |
|-------------------------------------------------------------------------------------|----------|----------|----------|--|
| C                                                                                   | -1.29638 | -0.49545 | -0.00002 |  |
| C                                                                                   | -1.29646 | 0.94226  | 0.00002  |  |
| C                                                                                   | 0.02904  | -0.87849 | 0.00002  |  |
| C                                                                                   | 0.02892  | 1.32544  | -0.00001 |  |
| O                                                                                   | 0.84582  | 0.22352  | 0.00003  |  |
| H                                                                                   | -2.15559 | -1.16335 | -0.00010 |  |
| H                                                                                   | -2.15574 | 1.61006  | 0.00010  |  |
| H                                                                                   | 0.53281  | -1.84132 | 0.00004  |  |
| H                                                                                   | 0.53259  | 2.28833  | -0.00008 |  |
| 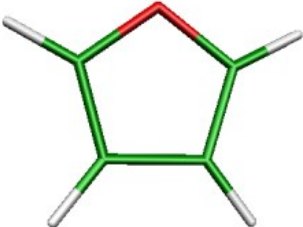   |          |          |          |  |
| <b>FC1H<sup>+</sup></b>                                                             |          |          |          |  |
| C                                                                                   | -1.39833 | -0.37925 | 0.01631  |  |
| C                                                                                   | -1.36822 | 0.99426  | 0.02622  |  |
| C                                                                                   | -0.00630 | -0.88829 | -0.02699 |  |
| C                                                                                   | 0.01949  | 1.34702  | -0.01017 |  |
| O                                                                                   | 0.81828  | 0.33109  | -0.04067 |  |
| H                                                                                   | -2.28022 | -1.02369 | 0.03610  |  |
| H                                                                                   | -2.20031 | 1.69644  | 0.05516  |  |
| H                                                                                   | 0.48827  | 2.33585  | -0.01567 |  |
| H                                                                                   | 0.30321  | -1.46156 | 0.86284  |  |
| H                                                                                   | 0.25212  | -1.44688 | -0.94213 |  |
|  |          |          |          |  |

| <b>FC2H+</b>                                                                        |          |          |          |  |
|-------------------------------------------------------------------------------------|----------|----------|----------|--|
| O                                                                                   | 0.79187  | 0.28836  | 0.00333  |  |
| C                                                                                   | 0.01035  | 1.29793  | 0.06080  |  |
| C                                                                                   | -1.40756 | 0.90254  | 0.06874  |  |
| C                                                                                   | -1.31205 | -0.59294 | 0.00148  |  |
| C                                                                                   | -0.00653 | -0.92627 | -0.03574 |  |
| H                                                                                   | 0.47326  | 2.28873  | 0.09621  |  |
| H                                                                                   | -2.14894 | -1.28986 | -0.01433 |  |
| H                                                                                   | 0.58888  | -1.83440 | -0.08543 |  |
| H                                                                                   | -1.93974 | 1.37253  | -0.78359 |  |
| H                                                                                   | -1.90454 | 1.29339  | 0.98056  |  |
| 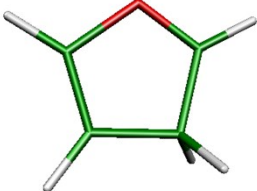   |          |          |          |  |
| <b>Thiophene</b>                                                                    |          |          |          |  |
| C                                                                                   | 2.34434  | 0.06353  | 0.00165  |  |
| C                                                                                   | 3.73014  | 0.19117  | -0.00663 |  |
| C                                                                                   | 4.15196  | 1.55424  | -0.00485 |  |
| C                                                                                   | 3.08047  | 2.44229  | 0.00482  |  |
| S                                                                                   | 1.56532  | 1.60788  | 0.01162  |  |
| H                                                                                   | 1.74681  | -0.84827 | 0.00242  |  |
| H                                                                                   | 4.40555  | -0.66703 | -0.01372 |  |
| H                                                                                   | 5.19405  | 1.88096  | -0.01048 |  |
| H                                                                                   | 3.10237  | 3.53221  | 0.00817  |  |
|  |          |          |          |  |

| <b>TC1H+</b> |         |          |          |  |
|--------------|---------|----------|----------|--|
| C            | 2.90100 | 2.57452  | 0.11834  |  |
| S            | 1.39960 | 1.56880  | 0.36461  |  |
| C            | 2.26242 | 0.14920  | 0.20137  |  |
| C            | 3.66765 | 0.30607  | -0.03766 |  |
| C            | 4.02807 | 1.63256  | -0.08492 |  |
| H            | 5.04462 | 1.99973  | -0.25511 |  |
| H            | 4.34325 | -0.54236 | -0.16267 |  |
| H            | 1.73866 | -0.81002 | 0.28069  |  |
| H            | 2.73046 | 3.23570  | -0.75333 |  |
| H            | 3.03226 | 3.21681  | 1.01067  |  |

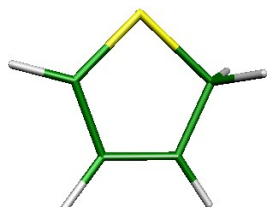

| <b>TC2H+</b> |         |          |          |  |
|--------------|---------|----------|----------|--|
| C            | 2.75485 | 2.54864  | 0.14859  |  |
| S            | 1.39389 | 1.62363  | 0.30588  |  |
| C            | 2.27389 | 0.09437  | 0.17554  |  |
| C            | 3.61101 | 0.30713  | 0.01155  |  |
| C            | 3.98905 | 1.74800  | -0.01651 |  |
| H            | 4.33872 | -0.50170 | -0.09024 |  |
| H            | 1.71732 | -0.84256 | 0.23233  |  |
| H            | 2.68973 | 3.64095  | 0.17144  |  |
| H            | 4.71698 | 2.01182  | 0.78064  |  |
| H            | 4.49756 | 2.03472  | -0.96222 |  |

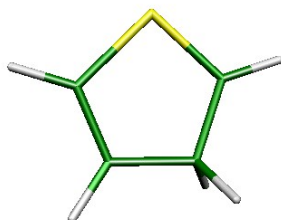

**Table SM3**

| state                                          | Energy (eV) | oscillator strengths | configuration                |
|------------------------------------------------|-------------|----------------------|------------------------------|
| Furan                                          |             |                      |                              |
| S <sub>1</sub> ( <sup>1</sup> A <sub>2</sub> ) | 5.86        | 0.0000               | ( $\pi_1/\sigma_1^*$ ) 45.3% |
| S <sub>2</sub> ( <sup>1</sup> B <sub>1</sub> ) | 6.31        | 0.1849               | ( $\pi_1/\pi_1^*$ ) 73.6%    |
| S <sub>3</sub> ( <sup>1</sup> B <sub>2</sub> ) | 6.38        | 0.0414               | ( $\pi_1/\sigma_3^*$ )84.5%  |
| S <sub>4</sub> ( <sup>1</sup> A <sub>2</sub> ) | 6.55        | 0.0000               | ( $\pi_1/\sigma_5^*$ ) 84.1% |
| S <sub>5</sub> ( <sup>1</sup> A <sub>1</sub> ) | 6.60        | 0.0001               | ( $\pi_2/\pi_1^*$ ) 24.7%    |
| [FC1H <sup>+</sup> ]                           |             |                      |                              |
| S <sub>1</sub> ( <sup>1</sup> A')              | 5.34        | 0.1382               | )89.3% ( $\pi_1/\pi_1^*$     |
| S <sub>2</sub> ( <sup>1</sup> A'')             | 6.41        | 0.0015               | ( $\sigma_1/\pi_1^*$ )84.3%  |
| S <sub>3</sub> ( <sup>1</sup> A'')             | 7.42        | 0.0002               | ( $\sigma_2/\pi_1^*$ )87.1%  |
| S <sub>4</sub> ( <sup>1</sup> A')              | 7.61        | 0.1283               | ( $\pi_2/\pi_1^*$ )89.0%     |
| S <sub>5</sub> ( <sup>1</sup> A'')             | 8.10        | 0.0015               | ( $\sigma_3/\pi_1^*$ )89.4%  |

**Table SM4:**

| state                                          | Energy (eV) | oscillator strengths | configuration               |
|------------------------------------------------|-------------|----------------------|-----------------------------|
| Thiophene                                      |             |                      |                             |
| S <sub>1</sub> ( <sup>1</sup> A <sub>1</sub> ) | 5.67        | 0.0731               | ( $\pi_1/\pi_1^*$ )70.2%    |
| S <sub>2</sub> ( <sup>1</sup> A <sub>2</sub> ) | 5.87        | 0.0000               | ( $\pi_1/\sigma_1^*$ )82.7% |
| S <sub>3</sub> ( <sup>1</sup> B <sub>1</sub> ) | 5.97        | 0.1079               | ( $\pi_2/\pi_1^*$ )85.7%    |
| S <sub>4</sub> ( <sup>1</sup> B <sub>2</sub> ) | 6.04        | 0.0191               | ( $\pi_2/\sigma_3^*$ )43.0% |
| S <sub>5</sub> ( <sup>1</sup> B <sub>2</sub> ) | 6.38        | 0.0007               | ( $\pi_1/\sigma_1^*$ )77.9% |
| [TC1H <sup>+</sup> ]                           |             |                      |                             |
| S <sub>1</sub> ( <sup>1</sup> A')              | 4.35        | 0.1370               | ( $\pi_1/\pi_1^*$ )93.8%    |
| S <sub>2</sub> ( <sup>1</sup> A'')             | 5.72        | 0.0020               | ( $\sigma_1/\pi_1^*$ )97.2% |
| S <sub>3</sub> ( <sup>1</sup> A')              | 6.31        | 0.0811               | ( $\pi_2/\pi_1^*$ )85.0%    |
| S <sub>4</sub> ( <sup>1</sup> A'')             | 7.03        | 0.0000               | ( $\sigma_2/\pi_1^*$ )57.3% |
| S <sub>5</sub> ( <sup>1</sup> A'')             | 7.05        | 0.0004               | ( $\pi_1/\sigma_1^*$ )21.3% |

**Table SM5**

| Molecule                                    | Basis Set   | Vertical transition energy/ev | Oscillator strength | Adiabatic transition energy/ev |
|---------------------------------------------|-------------|-------------------------------|---------------------|--------------------------------|
| Furan<br>S <sub>2</sub> -S <sub>0</sub>     | aug-cc-pVDZ | 6.31                          | 0.1849              | 5.96                           |
|                                             | aug-cc-pVTZ | 6.39                          | 0.1853              | 6.02                           |
|                                             | aug-cc-pVQZ | 6.41                          | 0.1850              | 6.03                           |
| Thiophene<br>S <sub>1</sub> -S <sub>0</sub> | aug-cc-pVDZ | 5.67                          | 0.0731              | 5.45                           |
|                                             | aug-cc-pVTZ | 5.74                          | 0.0727              | 5.52                           |
|                                             | aug-cc-pVQZ | 5.75                          | 0.0717              | 5.53                           |
